# Supplementary material for: The contribution of visceral fat to improved insulin signaling in Ames dwarf mice
Source: PubMed Central journal article supplement (PMC4032618; doi:10.1111/acel.12201), 2014-02-12
Supplement: NIHMS554664-supplement-01.pdf [file NIHMS554664-supplement-01.pdf]

### Supplement 1

Effect of VFR on body weight of df/df and N mice. Different letters represent statistical significance ( $p < 0.05$ )

### Supplement 2

Visceral fat content (absolute and percentage of body weight) of N and df/df mice. Different letters represent statistical significance ( $p < 0.05$ )
